# Supplementary material
Source: publisher figshare collection journal article supplement (https://sage.figshare.com/ndownloader/files/17785388)

**Figure 1 Supplement. Predicted and Actual Motion Picture Industry Employment Changes in High-Expenditure States.**

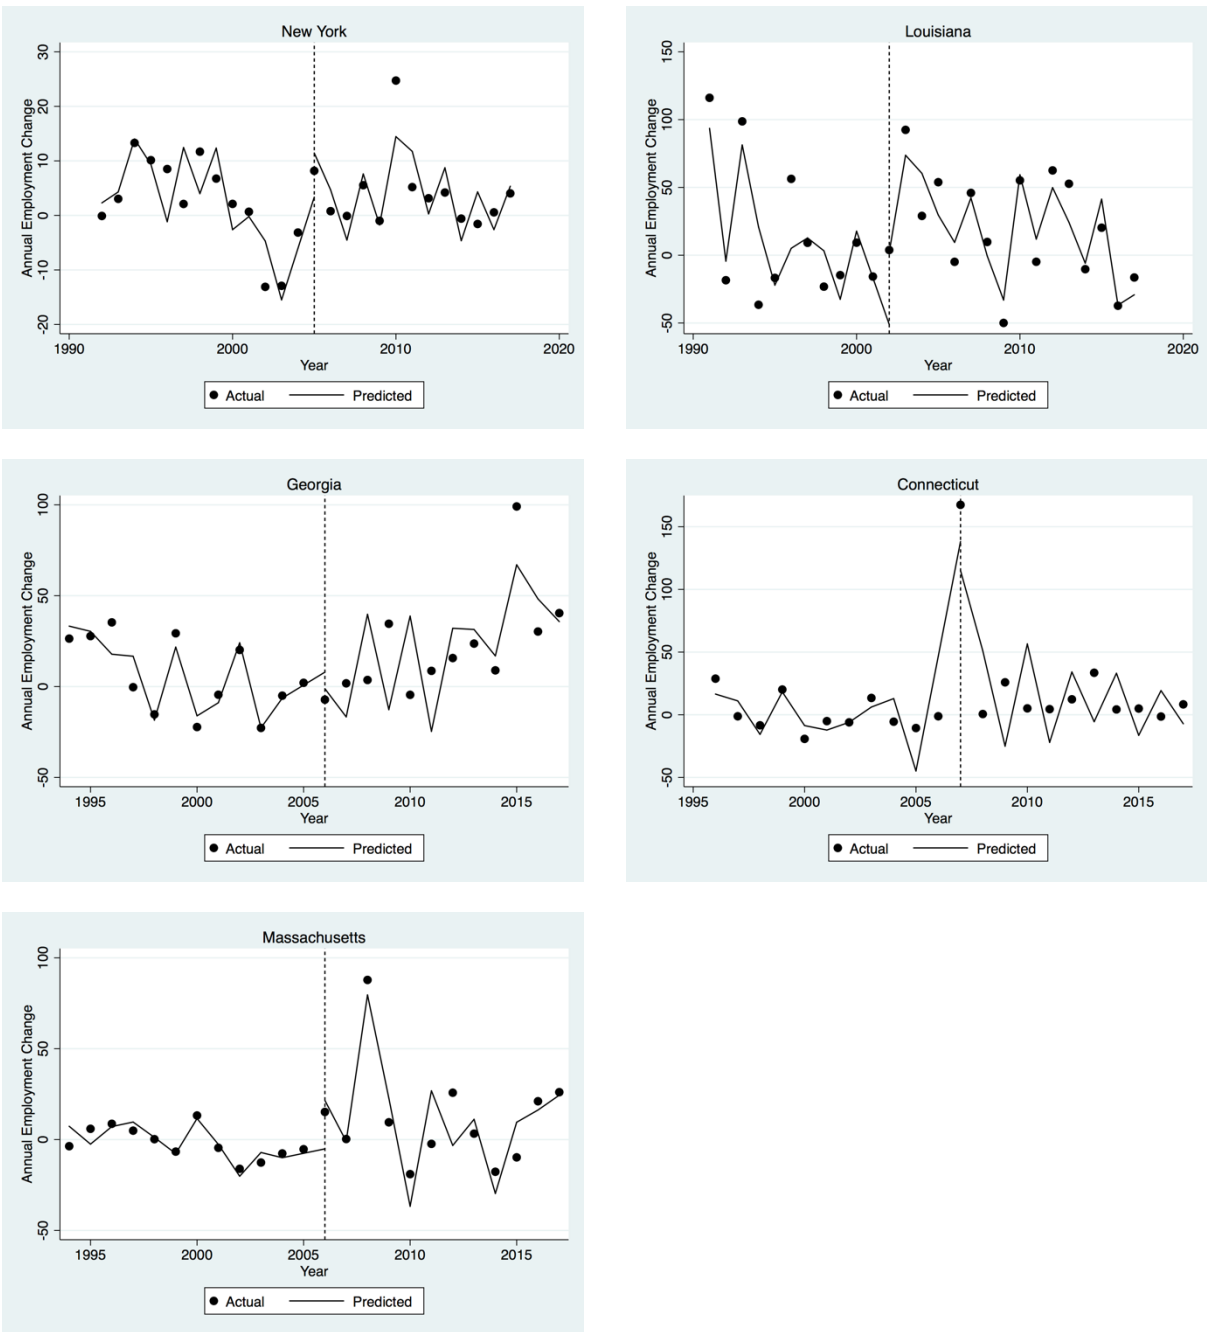

Supplement: Supplementary file 1 [file 17785388]
